# Supplementary material for: Metastable FeSe2 nanosheets as a one-for-all platform for stepwise synergistic tumor therapy
Source: Royal Society of Chemistry journal article supplement (doi:10.1039/d4tb00825a), 2024-01-01
Supplement: d4tb00825a1.pdf [file d4tb00825a1.pdf]

## Supplementary information

### **Metastable FeSe<sub>2</sub> nanosheets as a one-for-all platform for stepwise synergistic tumor therapy**

Naiyue Zhang,<sup>a,1</sup> Liwen Jiang,<sup>b,1</sup> Yumeng Yue,<sup>a</sup> Xiaomin Zhao,<sup>b</sup> Yanwei Hu,<sup>a</sup> Yali Shi,<sup>a</sup>  
Liyong Zhao,<sup>b</sup> Dawei Deng.\*<sup>ab</sup>

<sup>a</sup> Department of Biomedical Engineering, and <sup>b</sup> Department of Pharmaceutical Engineering, School of Engineering, China Pharmaceutical University, Nanjing 211198, China.

<sup>1</sup> Naiyue Zhang and Liwen Jiang contributed equally to this work.

\* Corresponding Author

E-mail: dengdawei@cpu.edu.cn (D. Deng)

## Materials

Selenium powder (Se, 99.9%), anhydrous sodium sulfite ( $\text{Na}_2\text{SO}_3$ , 98%), ethylene glycol (EG, 99%), Iron (II) chloride tetrahydrate ( $\text{FeCl}_2 \cdot 4\text{H}_2\text{O}$ , 99.95%), mercaptoacetic acid (TGA, 95%), glutathione (GSH, 98%), Rhodamine B (RB, 97%), anhydrous ethanol and other chemical reagents were purchased from Maclean's Biochemical Technology. 3,3',5,5'-tetramethyl Benzidine (TMB, 98%), 5,5'-dithiobis (2-nitrobenzoic acid) (DTNB, 98%), 3-(4,5-dimethyl-2-thiazolyl)-2,5-diphenyltetrazole bromide (MTT) and Dimethyl sulfoxide (DMSO, 99.9%) were purchased from Shanghai Aladdin Biotechnology Co., Ltd. RPMI-1640 medium, Fetal bovine serum (FBS), phosphate buffer solution (PBS), trypsin-EDTA Solution, 4% paraformaldehyde fix solution, reactive oxygen species assay kit, DAPI staining solution, lipid peroxidation sensor (C11-BODIPY<sup>581/591</sup>), reactive oxygen species fluorescent probe (ROS Brite 700), mouse breast cancer cells (4T1) and human normal breast epithelial cells (MCF 10A) were purchased from KeyGEN Biotechnology Co., Ltd. Calcein/PI cell viability/cytotoxicity assay kit, Annexin V-FITC apoptosis detection kit, GSH and GSSG assay kit, Amplex red, Mito-Tracker Green, cellular glutathione peroxidase assay kit and mitochondrial membrane potential assay kit were purchased from Shanghai Beyotime Biotechnology Co., Ltd.

## Characterization

TEM images were taken by an HT7700 transmission electron microscopy (Hitachi, Japan). HRTEM images were taken by a Tecnai G2 F30 high-resolution transmission electron microscopy (FEI, USA). The AFM image was taken by atomic force microscopy (Bruker, Germany). XRD was obtained by D8 ADVANCE X-ray powder diffractometer (Bruker, Germany). XPS was measured using the ESCALAB 250Xi X-ray photoelectron spectrometer (Thermo Fisher, USA). UV-vis-NIR absorption spectrum was measured using the UV-2600 spectrophotometer (Shimadzu, Japan). Fluorescence spectrum was determined via Shanghai Prism UV Fluorescence Spectrophotometer. EPR spectrum was measured using the EMX 10/12 electron paramagnetic resonance spectrometer (Bruker, Germany). Cell uptake analysis was

carried out by a dark field microscopy (CYTOVIVA, USA). Cell viability was measured by a microplate reader (Bethen Instruments, USA), Cell fluorescence images were measured by an inverted fluorescence microscope (Olympus, Japan) or a confocal laser scanning microscope (CLSM, Olympus, Japan). The flow cytometry was carried out using a flow cytometer (BD, USA). The biodistribution in vivo was determined by inductively coupled plasma atomic emission spectrometry (ICP-OES, Thermo Fisher Scientific, USA). In vivo fluorescence was detected by a small animal imaging system (IVIS, PerkinElmer Instrument Co., Ltd.).

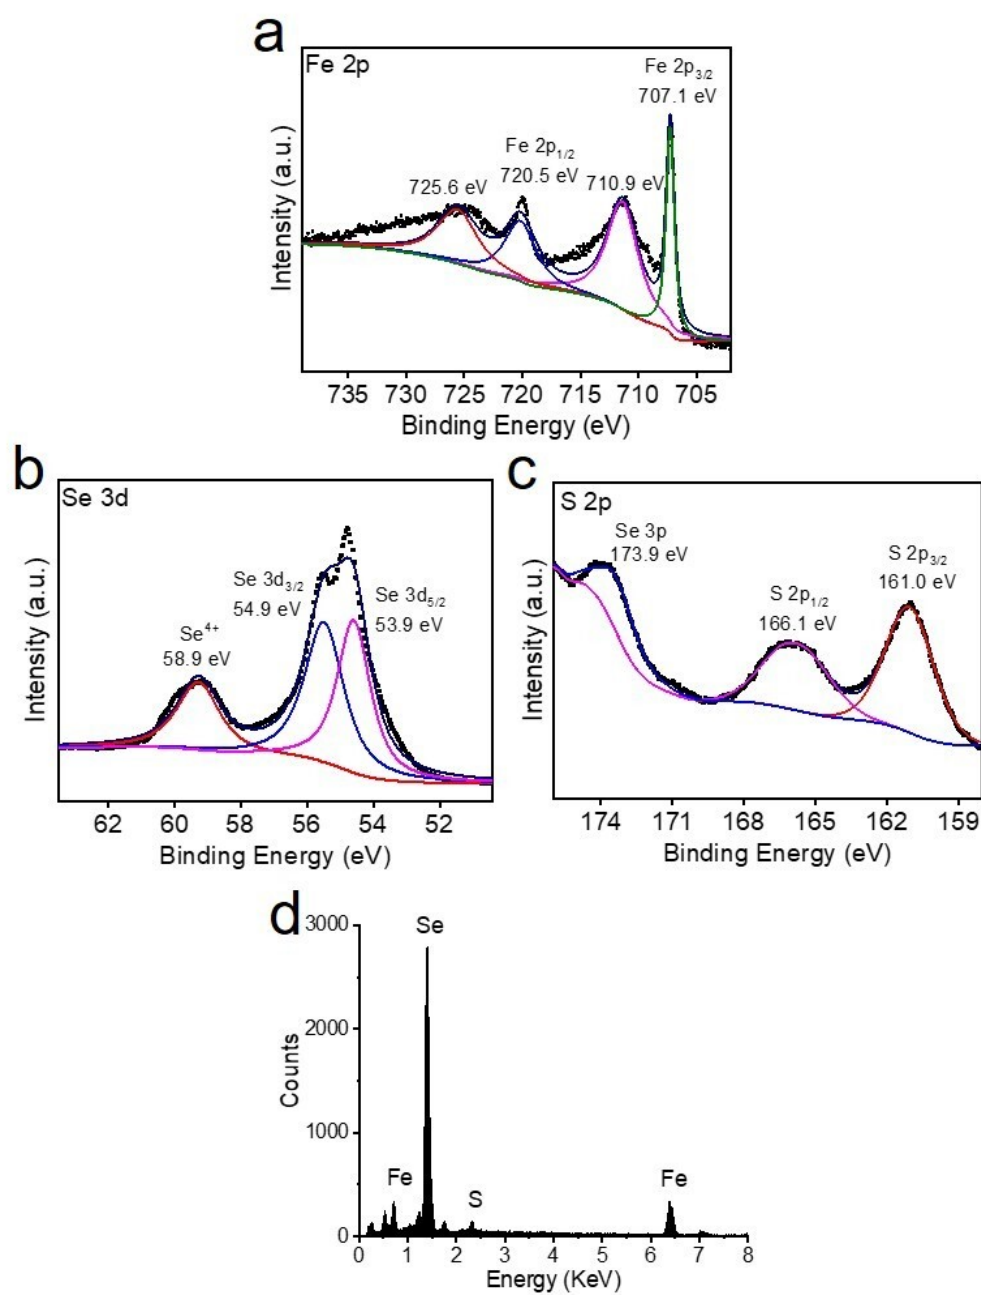

**Fig. S1.** (a-c) Fe 2p, Se 3d and S 2p XPS spectra of FeSe<sub>2</sub> NSs. These XPS spectra were obtained from a sample power of FeSe<sub>2</sub>. (d) the EDX spectrum of FeSe<sub>2</sub> NSs formed from the self-assembly of NPs.

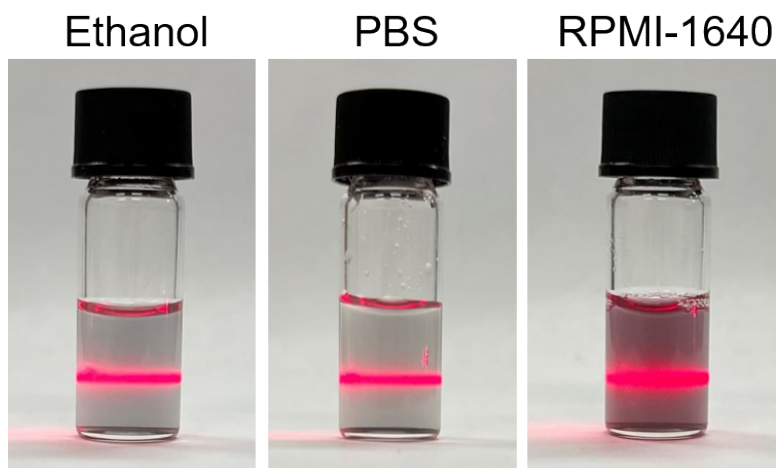

**Fig. S2.** Photographs of the FeSe<sub>2</sub> NSs dispersed in different solutions. The excellent water dispersion of the FeSe<sub>2</sub> NSs was confirmed by the Tindahl effect with laser irradiation.

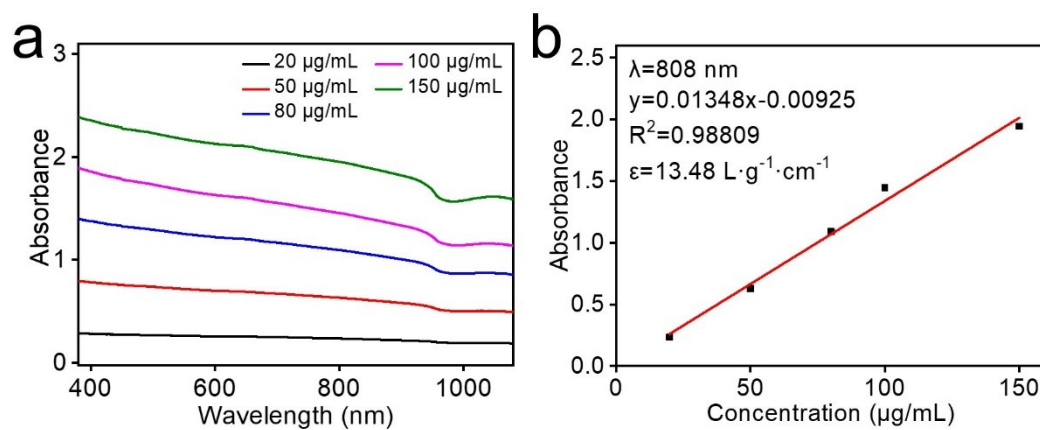

**Fig. S3.** (a) UV-vis absorption spectra of FeSe<sub>2</sub> NSs with different concentrations. (b) Mass extinction coefficient of FeSe<sub>2</sub> at 808 nm.

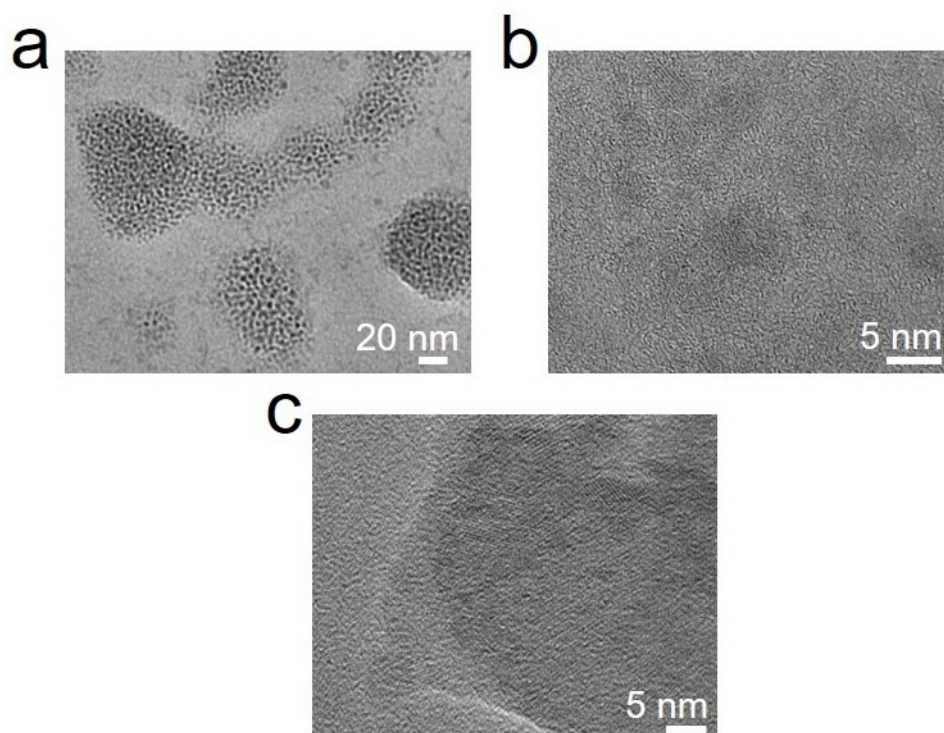

**Fig. S4.** (a, b) HR-TEM images of FeSe<sub>2</sub> nanoparticles reaction for 1 min after injection of selenium source. (c) HR-TEM image of FeSe<sub>2</sub> NSs formed at about 15 min.

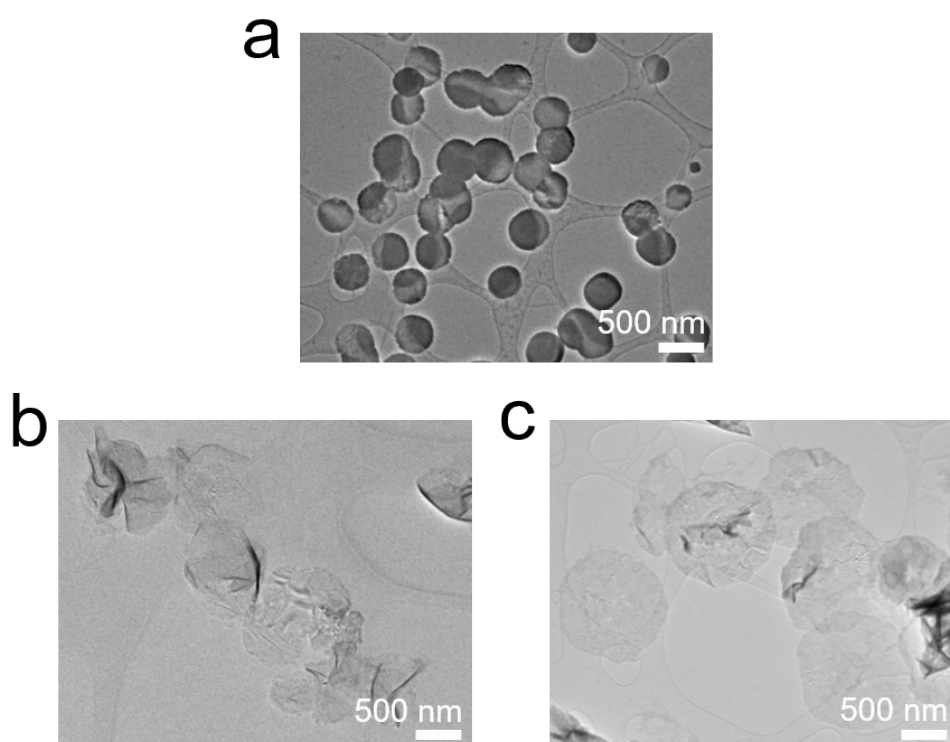

**Fig. S5.** TEM images of FeSe<sub>2</sub> NSs with increased diameters: (a) 400 nm, (b) 700 nm and (c) 1200 nm. Scale bar = 500 nm.

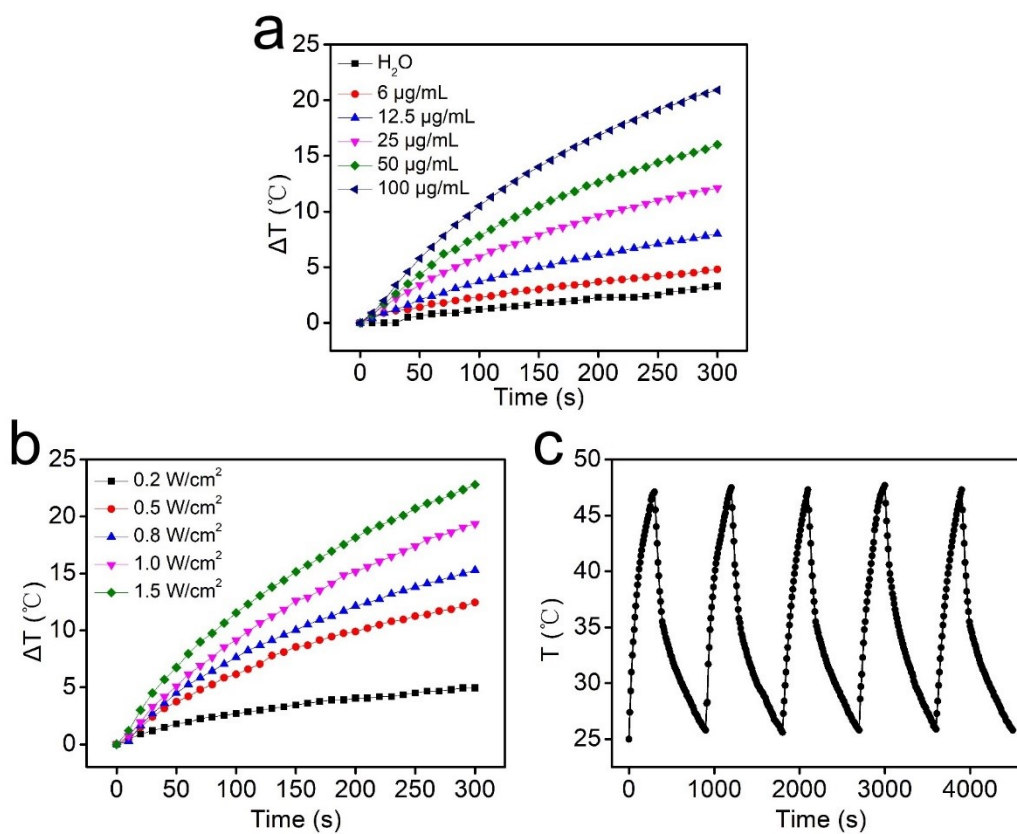

**Fig. S6.** (a) Temperature variations of FeSe<sub>2</sub> NSs solutions with different concentrations under the irradiation for 5 min (808 nm, 1  $\text{W/cm}^2$ ). (b) Temperature variations of FeSe<sub>2</sub> NSs solutions (100  $\mu\text{g/mL}$ ) under the 808 nm irradiation for 5 min at different laser power densities. (c) Temperature variations during five heating-cooling cycles.

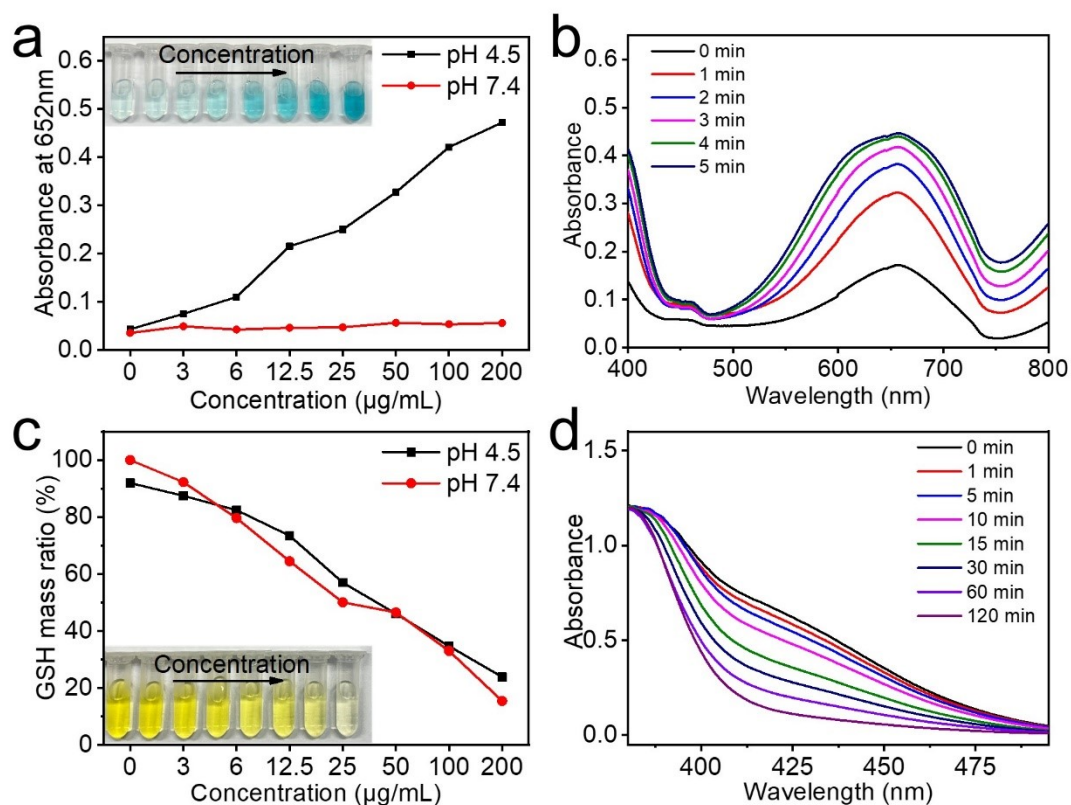

**Fig. S7.** (a) Changes in the absorbance values (at 652 nm) of TMB solutions containing increased FeSe<sub>2</sub> concentration at pH 4.5 or at pH 7.4. (b) UV-vis absorption spectra of the POD-like activities of FeSe<sub>2</sub> NSs over time by TMB method. (c) Changes in the absorbance values (at 412 nm) of DTNB solutions containing increased FeSe<sub>2</sub> concentration at pH 4.5 or at pH 7.4. (d) UV-vis absorption spectra of the GSHOx-like activities of FeSe<sub>2</sub> NSs over time by DTNB method.



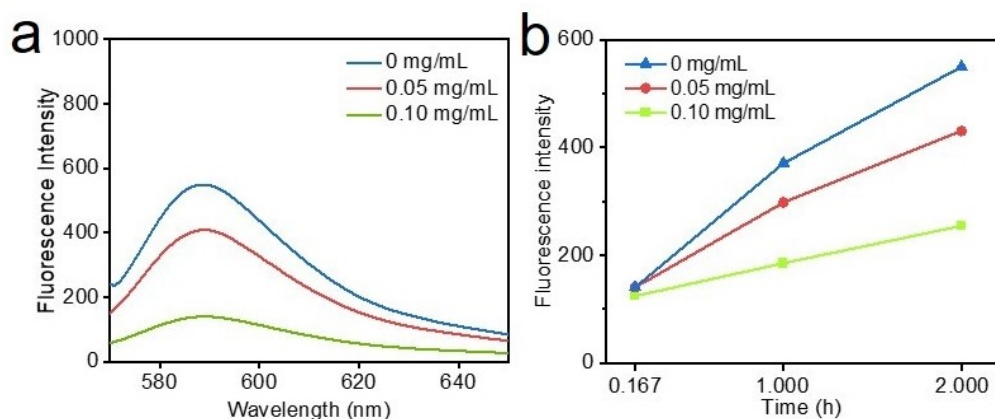

**Fig. S8.** (a) Generation of H<sub>2</sub>O<sub>2</sub> after incubation with FeSe<sub>2</sub> NSs for 2 h was determined in 585 nm. (b) The generation of H<sub>2</sub>O<sub>2</sub> in GSH solution after treated with FeSe<sub>2</sub> NSs for different time.

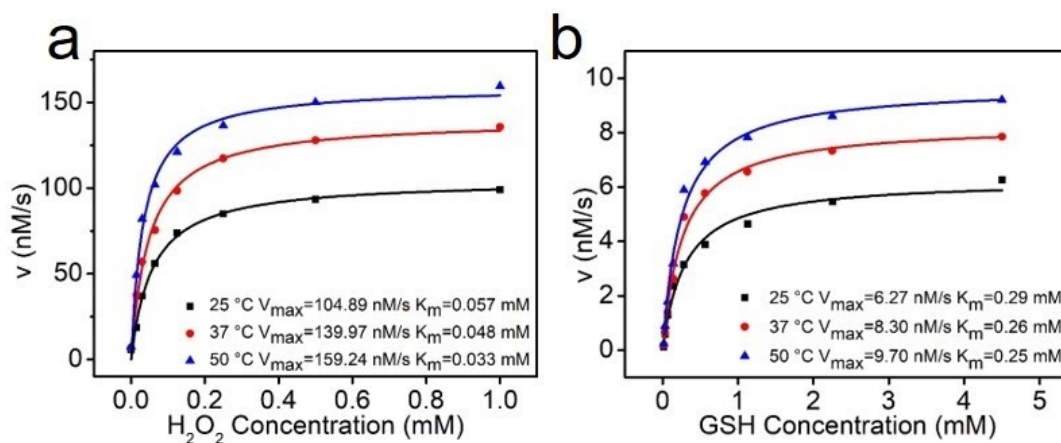

**Fig. S9.** Kinetic assay of POD-like (a) and GSHOx-like (b) activities using H<sub>2</sub>O<sub>2</sub> and GSH as substrates, respectively.

**Table S1.**  $V_{max}$  and  $K_m$  values of various nanozymes.

| POD-like | GSHOx-like | ref |
|----------|------------|-----|
|----------|------------|-----|

|                         | $V_{\max}$ (nM/s) | $K_m$ (mM) | $V_{\max}$ (nM/s) | $K_m$ (mM) |           |
|-------------------------|-------------------|------------|-------------------|------------|-----------|
| $\text{Fe}_3\text{O}_4$ | 104.4             | 135.3      |                   |            | 1         |
| $\text{FeS}_2$          | 135.4             | 0.041      | 980               | 0.66       | 2         |
| Co- $\text{FeSe}_2$     | 27.5              | 2.74       |                   |            | 3         |
| $\text{FeSe}_2$         | 159.24            | 0.033      | 9.7               | 0.25       | This work |

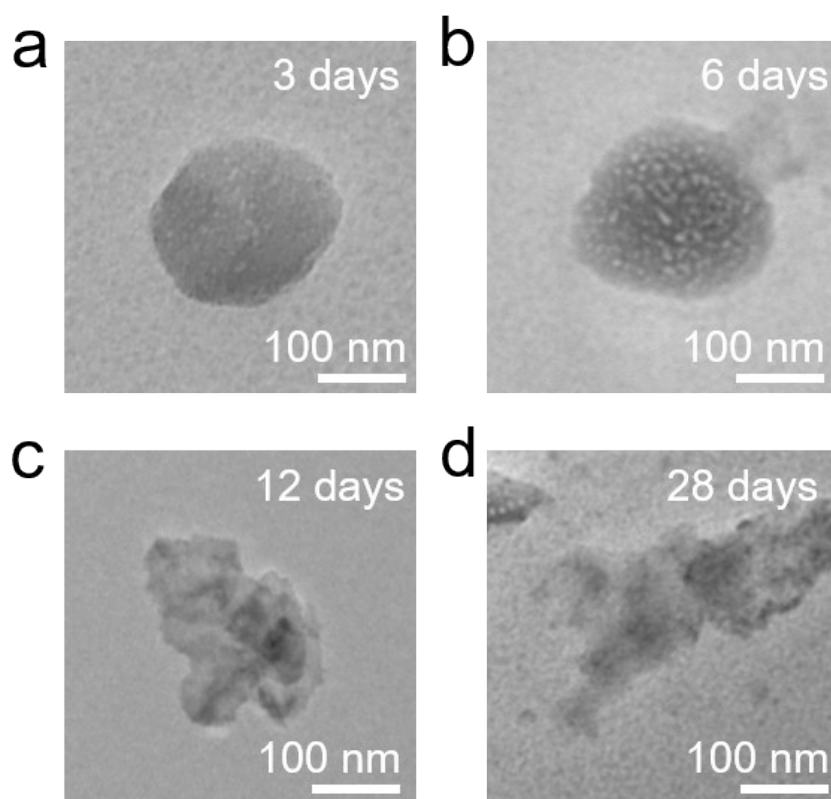

**Fig. S10.** TEM images of  $\text{FeSe}_2$  NS prepared at the TGA/Fe ratio of 4/1 and stored in PBS for different days, showing  $\text{FeSe}_2$  NS stored in PBS can maintain the stability for almost one month. Scale bar = 100 nm.

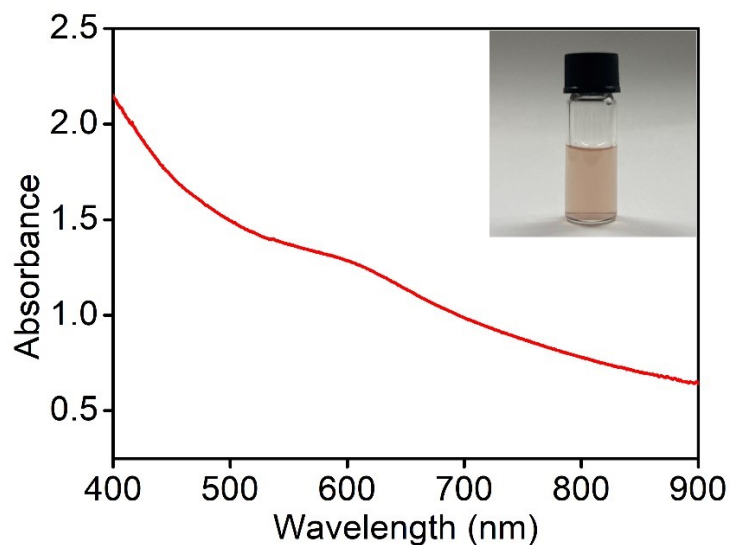

**Fig. S11.** UV-vis absorption spectra of the non-stationary state of red selenide generated at the TGA/Fe ratio of 1/1<sup>4</sup>.

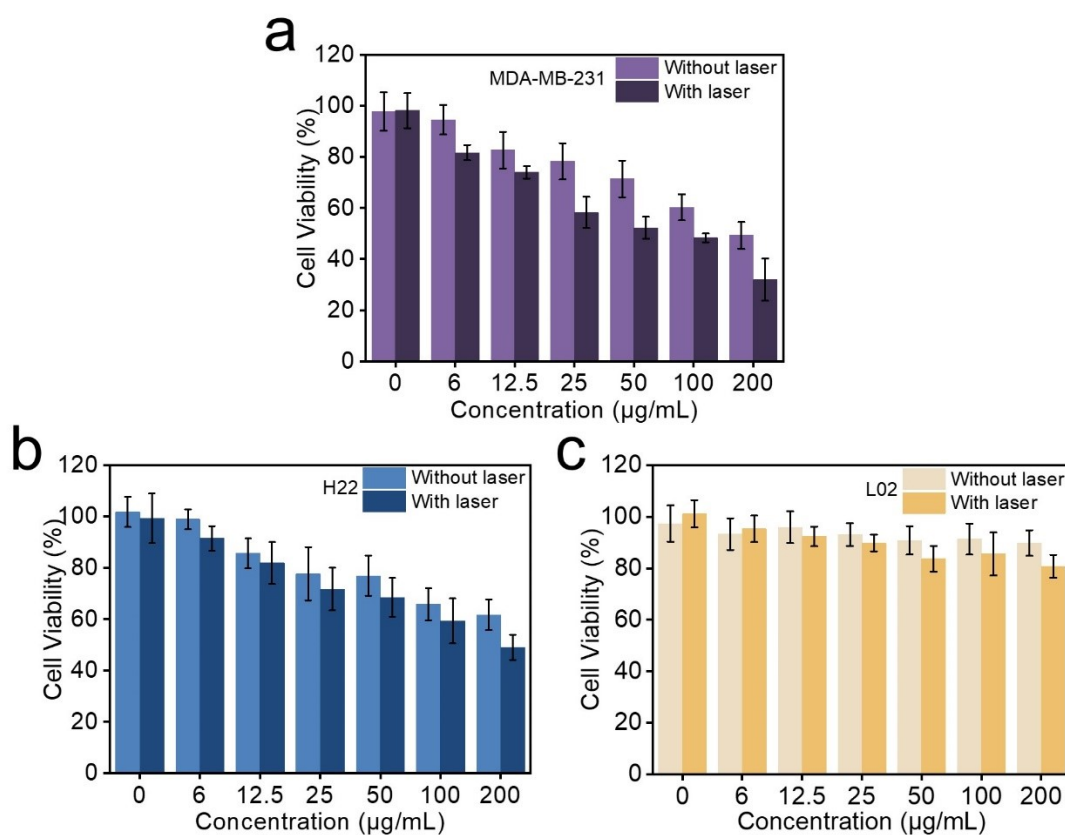

**Fig. S12.** Cell viabilities during on/off the laser irradiation (808 nm, 1.0 W/cm<sup>2</sup>) of (a) MDA-MB-231, (b) H22 and (c) L02 cells incubated with FeSe<sub>2</sub> NSs (n=5).

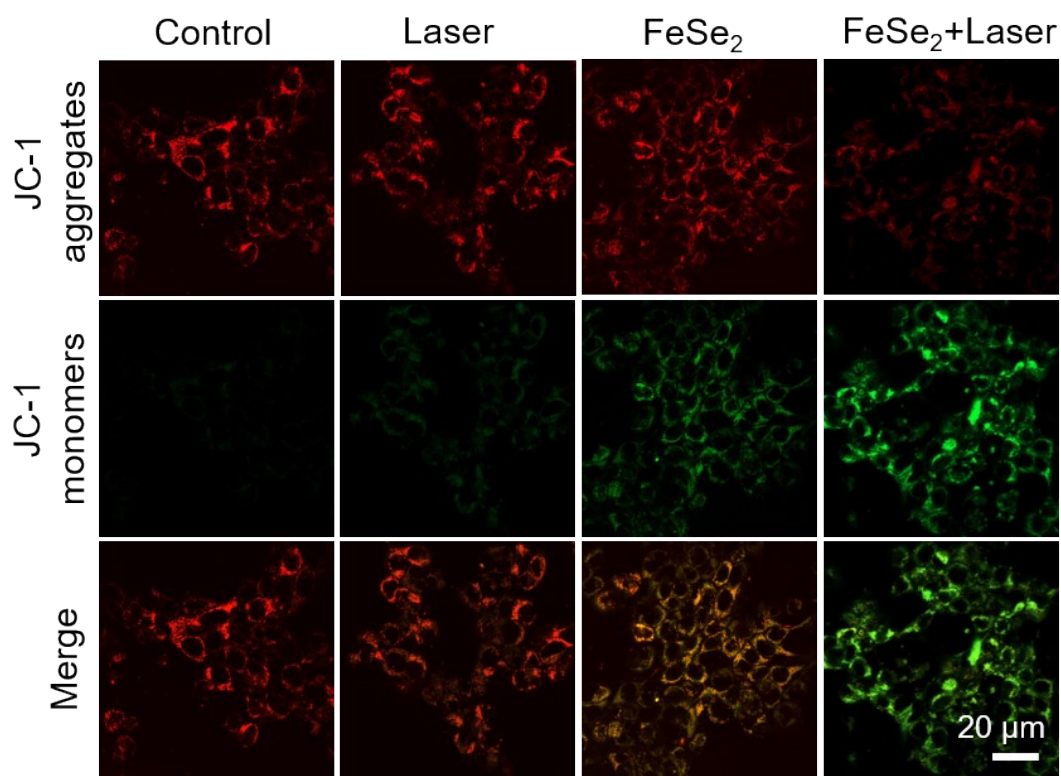

**Fig. S13.** Changes of mitochondrial membrane potential in 4T1 cells after different treatments. Red JC-1 aggregate indicates mitochondria with a normal membrane potential, and the green JC-1 monomer means the mitochondria with a depolarized membrane (impaired mitochondria). Scale bar = 20  $\mu\text{m}$ .

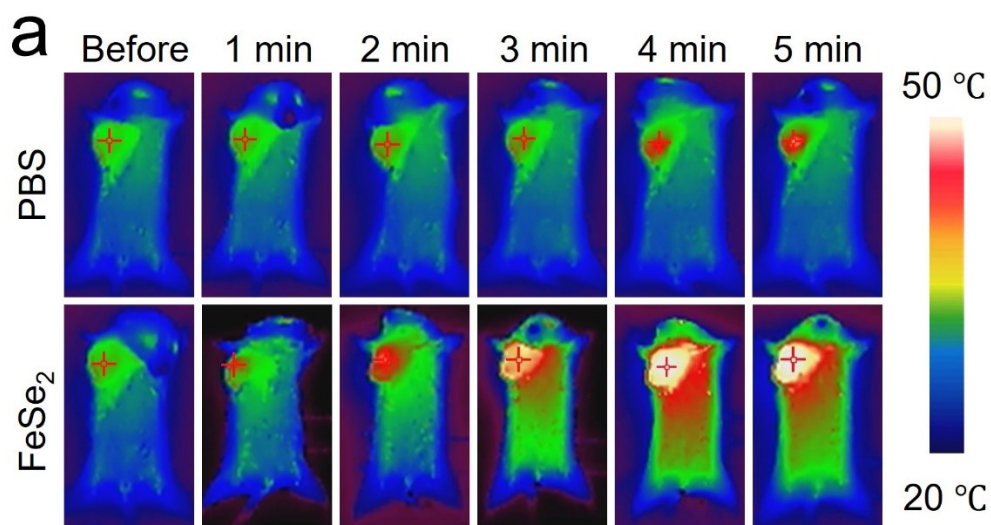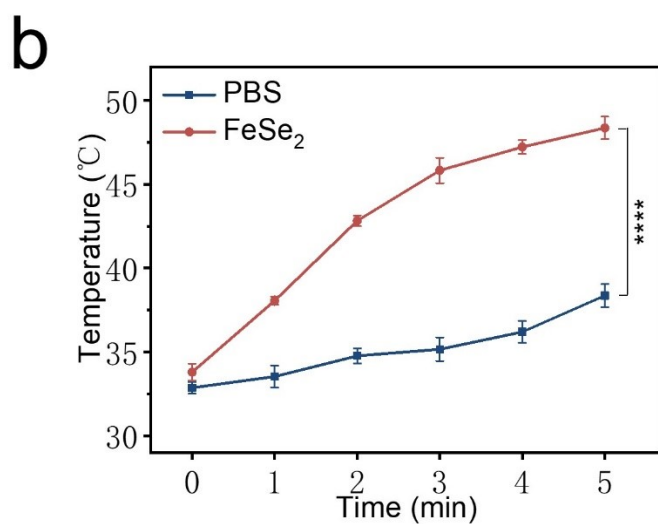

**Fig. S14.** (a) Infrared thermal imaging images of mice irradiated with laser (808 nm, 1 W/cm<sup>2</sup>) at different times on tumor sites 6 h after injection of PBS or FeSe<sub>2</sub> NSs, and (b) the corresponding temperature values acquired within 5 min.

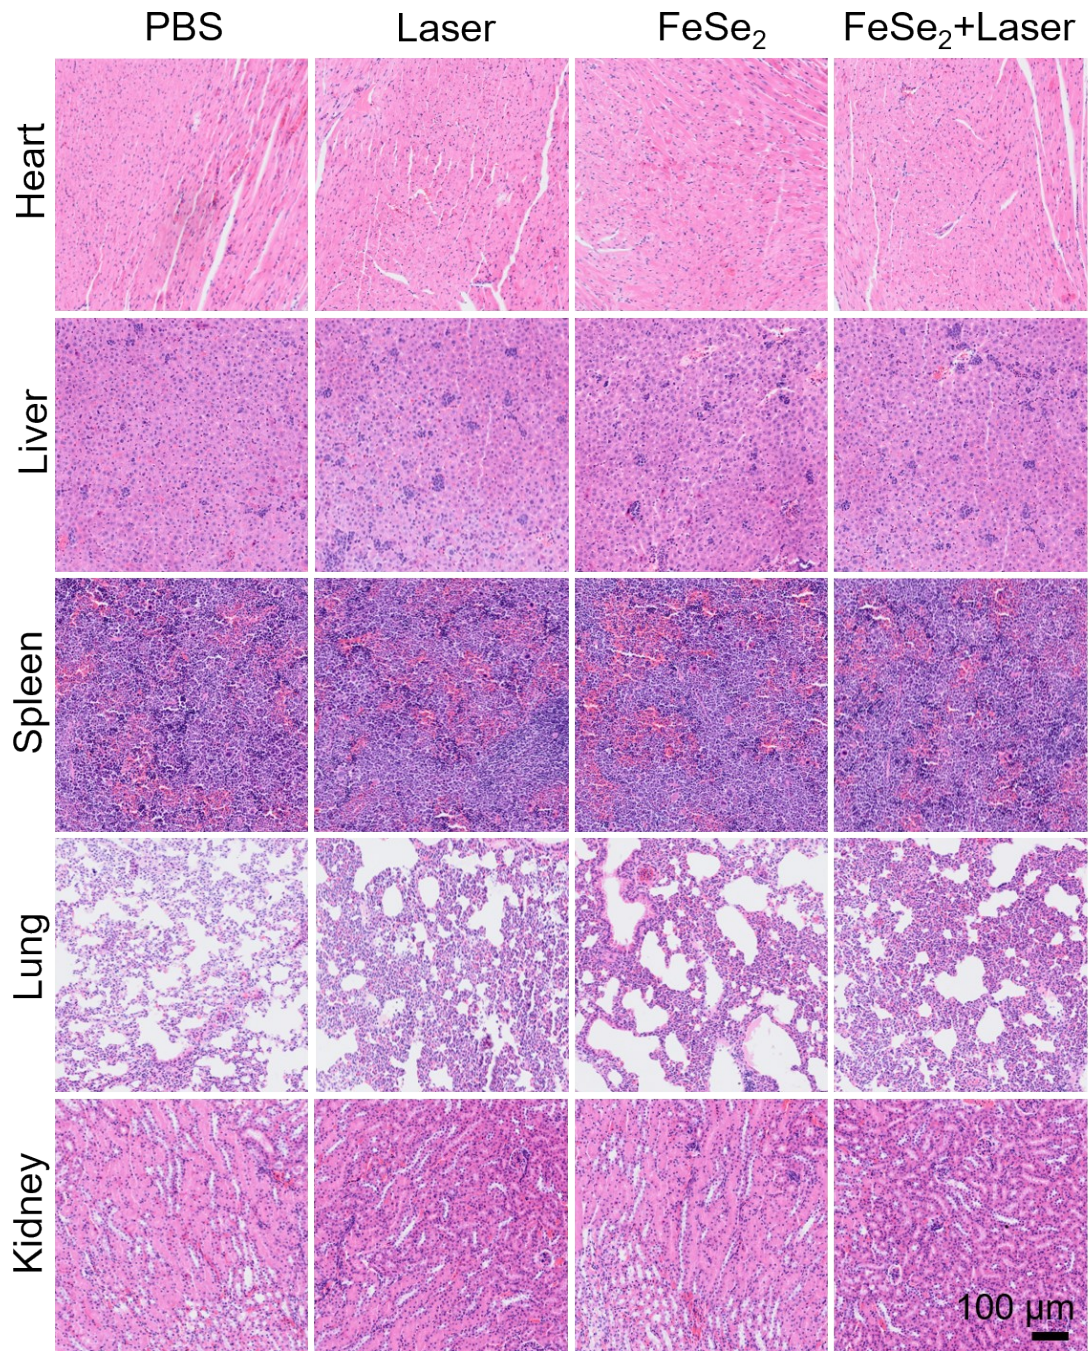

**Fig. S15.** H&E staining images of major organs in 4T1 breast tumor-bearing mice. Scale bar = 100  $\mu\text{m}$ .

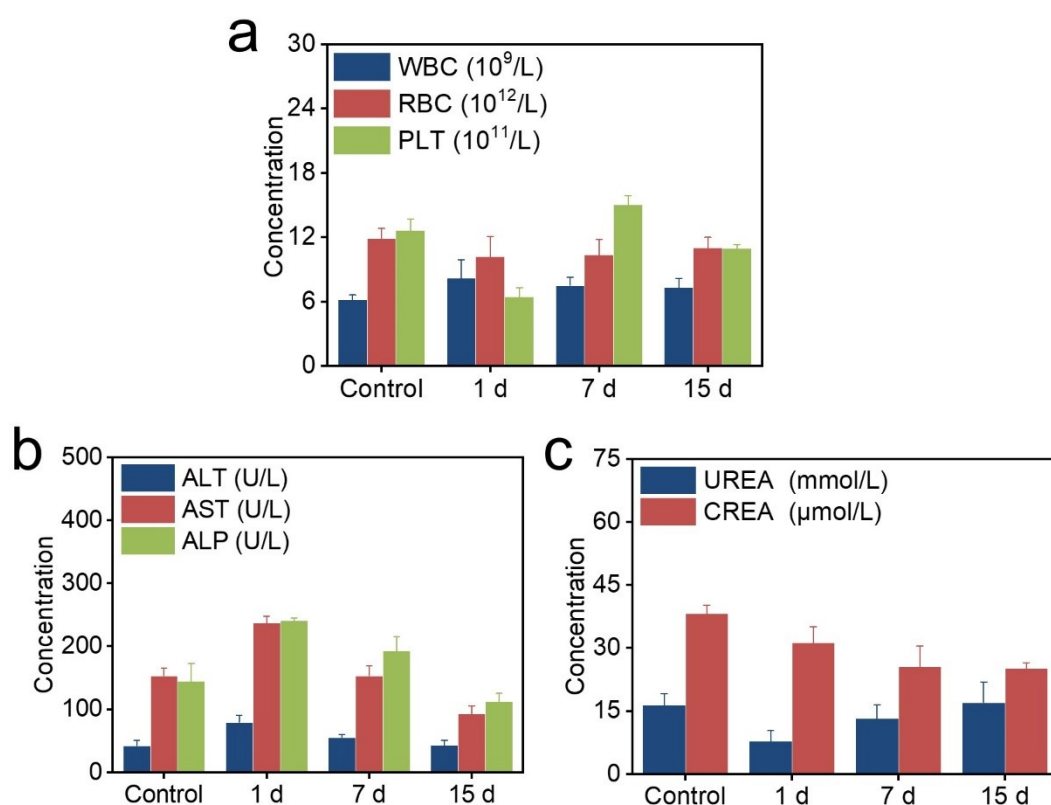

**Fig. S16.** (a) The blood routine indicators and serum biochemical analysis including (b) liver function and (c) renal function results of mice at different time points after the therapy(n=3).

## References

1. L. Gao, J. Zhuang, L. Nie, J. Zhang, Y. Zhang, N. Gu, T. Wang, J. Feng, D. Yang, S. Perrett and X. Yan, *Nat. Nanotechnol.*, 2007, **2**, 577-583.
2. X. Meng, D. Li, L. Chen, H. He, Q. Wang, C. Hong, J. He, X. Gao, Y. Yang, B. Jiang, G. Nie, X. Yan, L. Gao and K. Fan, *ACS Nano*, 2021, **15**, 5735-5751.
3. J. Zhang, E. Ha, D. Li, S. He, L. Wang, S. Kuang and J. Hu, *J. Mat. Chem. B*, 2023, **11**, 4274-4286.
4. S. Dhanjal and S. S. Cameotra, *Microb. Cell. Fact.*, 2010, **9**, 52.
